# Supplementary material
Source: PubMed Central journal article supplement (PMC3129883)
Supplement: figS2.pdf [file figS2.pdf]

Supplementary Fig 2

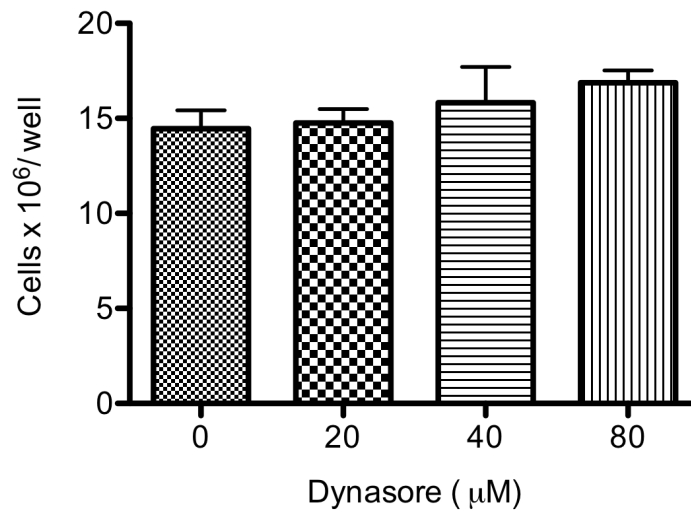

Fig S2: Dynasore is did not affect cell survival during the experiment. COS7 cells were incubated for 1 hr at 37°C with 0.8% DMSO (0 μM treatment) or various doses of dynasore, washed three times with PBS, and the adherent cells trypsinized and counted.
